# Supplementary material for: Temperature-responsive nanofibers for controllable oil/water separation
Source: Royal Society of Chemistry journal article supplement (doi:10.1039/c5ra08851h), 2015-01-01
Supplement: c5ra08851h1.pdf [file c5ra08851h1.pdf]

SUPPORTING INFORMATION

## **Temperature-responsive nanofibers for controllable oil/water separation**

Yuanfeng Wang, Chuilin Lai, Huawen Hu, Yang Liu, Bin Fei and John H. Xin\*

Nanotechnology Centre, Institute of Textiles and Clothing, The Hong Kong  
Polytechnic University, Hong Kong SAR 999077, China.

### **Corresponding Author**

\*Fax: +86-852-2766-6474. E-mail: [tcxinjh@polyu.edu.hk](mailto:tcxinjh@polyu.edu.hk).

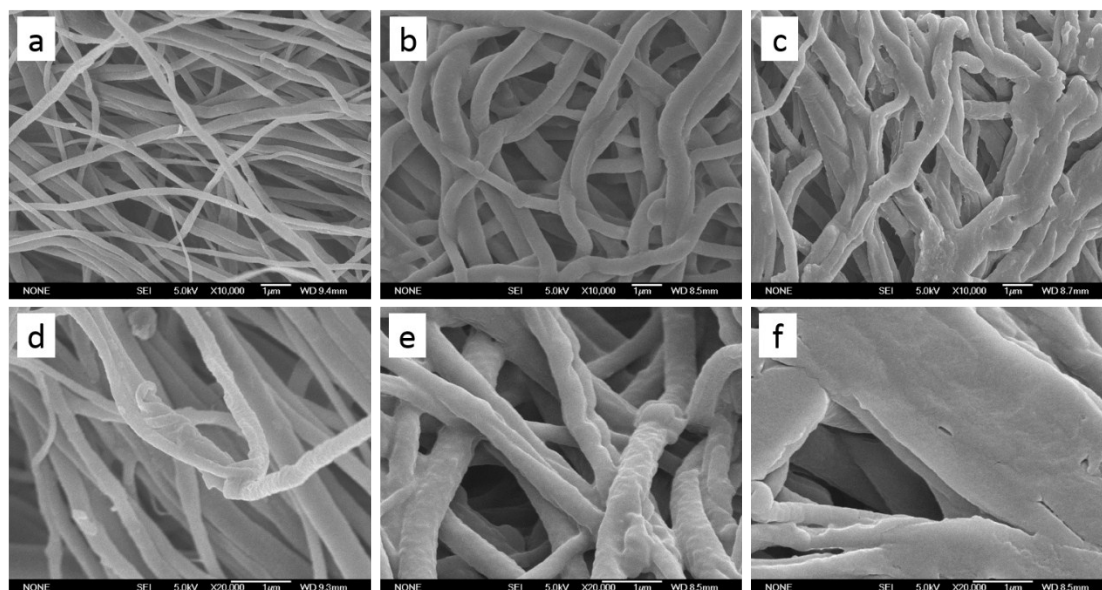

Fig. S1 SEM images of PNIPAAm-modified nanofibers with different grafting duration: 2 h (a,d), 6 h (b,e), 10 h (c,f); a-c are SEM images with lower magnification (x10,000) and d-f are SEM images with higher magnification (x20,000).

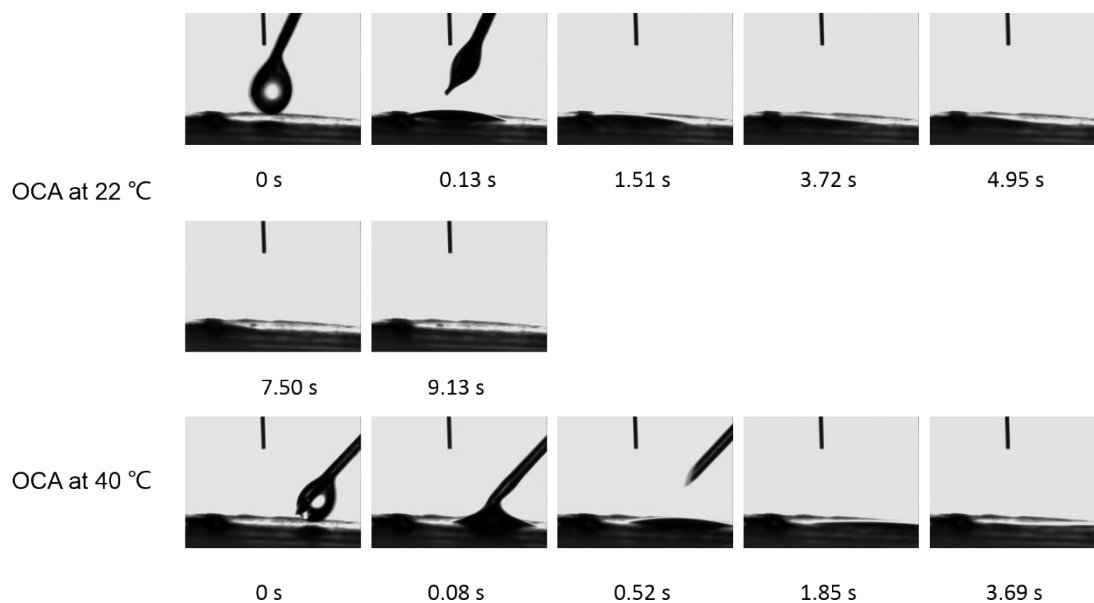

Fig. S2 Pictures recording the time needed by oil droplets to become  $0^\circ$  on PNIPAAm-RC nanofibrous membrane at  $22^\circ\text{C}$  and  $40^\circ\text{C}$ .

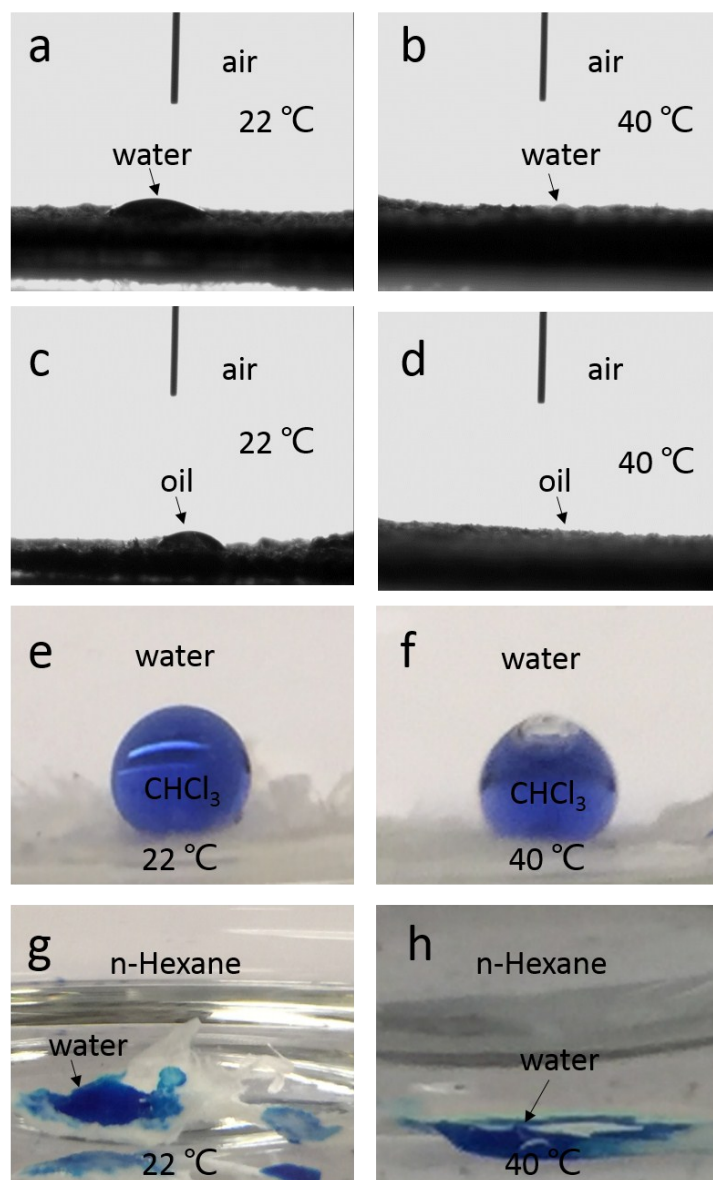

Fig. S3 In-air water wettability of unmodified RC nanofibrous membrane at 22 °C (a) and 40 °C (b); In-air oil wettability of unmodified RC nanofibrous membrane at 22 °C (c) and 40 °C (d); Oil and water wettability of the unmodified RC nanofibrous membrane at the oil-water-solid interface: under-water oleophobic at both 22 °C (e) and 40 °C (f); under-oil hydrophilic at both 22 °C (g) and 40 °C (h).
